# Supplementary material
Source: Springer Nature journal article supplement (https://www.springermedizin.de/resource/supplementary/12963_2013_216_MOESM9_ESM.pdf/9572410)

Males

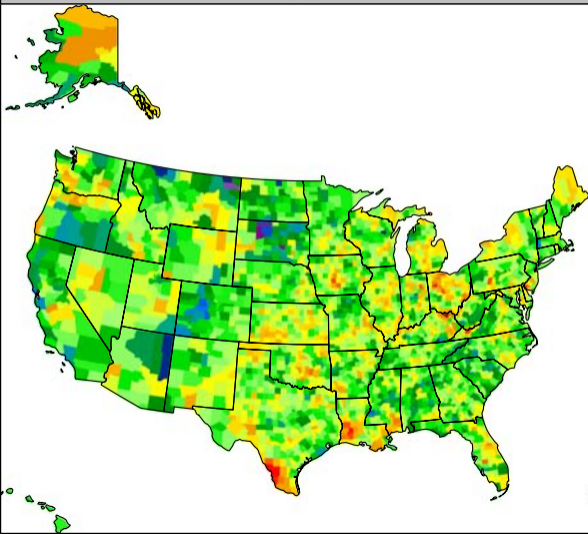

Females

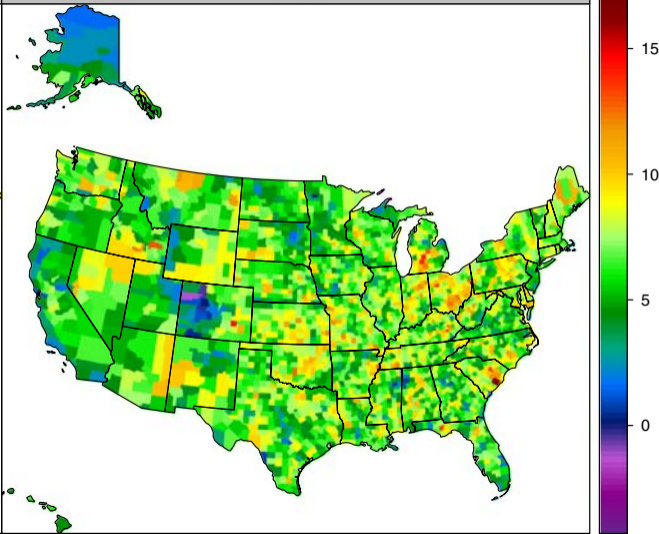

Supplement: MOESM9 [file 9572410]
